# Supplementary material for: Insufficient Evidence of a Breastmilk Microbiota at Six-Weeks Postpartum: A Pilot Study
Source: MDPI journal article supplement (doi:10.3390/nu15030696), 2023-01-30
Supplement: s1 [file s1]

## Supplementary figures

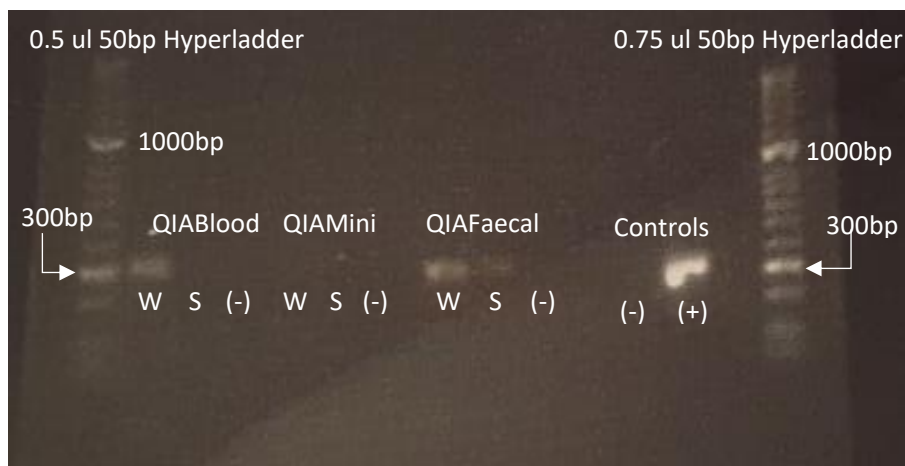

**Figure S1:** Gel electrophoresis of 25 cycles of PCR targeting a region of the 16s rRNA gene (expected length ~316bp) for comparison of bacterial DNA extraction. QIABlood = QIAamp DNA blood mini kit, QIAMini = QIAamp DNA mini kit, and QIAFaecal = QIAamp DNA PowerFaecal Pro DNA kit, Controls = PCR controls, W = whole milk, S = skim milk, (-) = negative control, (+) = positive control

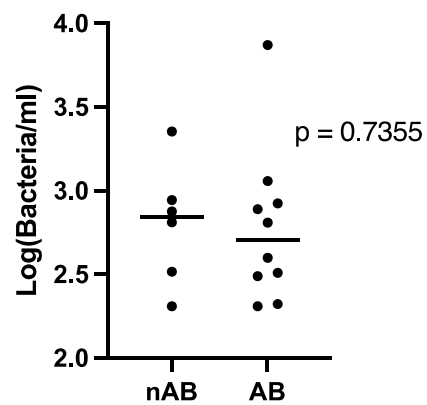

**Figure S2:** Comparison of Log(Bacterial/ml) of breastmilk samples at 6 weeks post-partum unaffected by antibiotics nAB (n = 6, vaginally delivered) and those affected by antibiotics in the previous 6 weeks (n = 10, 8 Caesarean Delivered, 2 vaginally delivered)
